# Supplementary material
Source: HighWire-hosted journal article supplement (https://ard.bmj.com/content/78/7/922)
Supplement: inline-supplementary-material-1 [file inline-supplementary-material-1.docx]

Supplemental table 1. Characteristics of subjects not included in the analysis (N = 6). Plus-minus values are mean ± standard deviation; other values are number (percent). AS = ankylosing spondylitis.

|  | Value | Range |
| --- | --- | --- |
| Age, years | 35.5 ± 11.5 | 22 – 49 |
| Men | 4 (67) |  |
| Duration of AS, years | 12.0 ± 7.6 | 2 – 24 |
| HLA-B27 present | 4 (80)* |  |
| Bath AS Functional Index (0 – 100) | 18.1 ± 13.5 | 2 – 38.0 |
| Bath AS Disease Activity Index (0 – 10) | 2.7 ± 1.3 | 2 – 5.2 |
| Peripheral arthritis | 0 (0) |  |
| Hip or shoulder involvement | 0 (0) |  |
| Median Lumbar modified Stoke AS Spine score (0 – 36) | 0 | 0 – 3 |
| Radiographic lumbar syndesmophytes | 0 (0) |  |

*of 5 subjects tested

Supplemental table 2. Results of the generalized estimating equation model of the association between angular sector (distance relative to the abutting sector), minimum distance of the aorta from the vertebral rim at the abutting section, the interaction between these measures, and intervertebral disk space (IDS) level. In this model, angular sector was treated as a continuous variable. The likelihood of a syndesmophyte in a given sector was greater (odds ratio 1.29) for each 5 degrees further that the sector was from the abutting sector. The likelihood of a syndesmophyte decreased for each additional millimeter closer that the aorta was to the spine at the abutting sector (odds ratio 0.94). The likelihood of a syndesmophyte at a given IDS was not different from the frequency at T12-L1, which we chose as the reference IDS. Lastly, the interaction between angular sector and aorta distance indicates that syndesmophytes are more likely in angular sectors that are both further away from the abutting sector and when the aorta is further from the spine at the abutting sector.

| Variable | Odds Ratio | 95% CI | P-value |
| --- | --- | --- | --- |
| Distance from the abutting sector (per 5 degrees) | 1.29 | (1.14, 1.46) | 7.8 x 10-05 |
| Minimum distance of aorta at abutting sector (mm) | 0.94 | (0.91, 0.97) | 2.0 x 10-05 |
| IDS T5-T6 | 1.31 | (0.59, 2.93) | 0.51 |
| IDS T6-T7 | 1.21 | (0.56, 2.64) | 0.63 |
| IDS T7-T8 | 0.86 | (0.43, 1.75) | 0.68 |
| IDS T8-T9 | 0.75 | (0.36, 1.58) | 0.45 |
| IDS T9-T10 | 0.85 | (0.40, 1.82) | 0.68 |
| IDS T10-T11 | 1.49 | (0.94, 2.35) | 0.08 |
| IDS T11-T12 | 0.86 | (0.58, 1.28) | 0.47 |
| IDS T12-L1 (reference) | 1.00 | - | - |
| IDS L1-L2 | 0.85 | (0.61, 1.19) | 0.34 |
| IDS L2-L3 | 0.72 | (0.47, 1.10) | 0.13 |
| IDS L3-L4 | 0.75 | (0.50, 1.15) | 0.19 |
| Angular sector (per 5 degrees) x Aorta distance (mm) | 1.01 | (1.00, 1.01) | 7.6 x 10-05 |

Supplemental table 3. Results of the generalized estimating equation model of the association between angular sector (relative to the abutting sector), minimal distance of the aorta from the vertebral rim at the abutting section, the interaction between these measures, and intervertebral disk space (IDS) level. In this model, angular sector was treated as a categorical variable.

| Variable | Odds Ratio | 95% CI | P-value |
| --- | --- | --- | --- |
| Sector -90 | 11.66 | (2.08, 65.48) | 0.005 |
| Sector -85 | 9.04 | (2.23, 36.68) | 0.002 |
| Sector -80 | 7.74 | (1.44, 41.51) | 0.02 |
| Sector -75 | 8.16 | (1.83, 36.41) | 0.006 |
| Sector -70 | 7.20 | (1.56, 33.19) | 0.02 |
| Sector -65 | 8.74 | (1.97, 38.89) | 0.004 |
| Sector -60 | 12.05 | (2.79, 52.08) | 8.54 x 10-04 |
| Sector -55 | 6.20 | (1.36, 28.24) | 0.02 |
| Sector -50 | 5.14 | (1.23, 21.52) | 0.03 |
| Sector -45 | 4.00 | (0.98, 16.26) | 0.06 |
| Sector -40 | 2.61 | (0.68, 10.09) | 0.16 |
| Sector -35 | 2.33 | (0.65, 8.36) | 0.19 |
| Sector -30 | 2.01 | (0.65, 6.27) | 0.22 |
| Sector -25 | 1.86 | (0.65, 5.36) | 0.24 |
| Sector -20 | 1.88 | (0.66, 5.44) | 0.23 |
| Sector -15 | 1.61 | (0.66, 3.94) | 0.30 |
| Sector -10 | 1.40 | (0.63, 3.15) | 0.41 |
| Sector -5 | 1.14 | (0.70, 1.89) | 0.58 |
| Abutting sector 0 (reference) | 1.00 | - | - |
| Sector 5 | 1.66 | (0.93, 2.99) | 0.09 |
| Sector 10 | 2.20 | (0.99, 4.90) | 0.06 |
| Sector 15 | 2.67 | (1.12, 6.42) | 0.03 |
| Sector 20 | 4.29 | (1.60, 11.51) | 0.004 |
| Sector 25 | 5.04 | (1.73, 14.71) | 0.003 |
| Sector 30 | 6.24 | (2.31, 16.90) | 3.11 x 10-04 |
| Sector 35 | 9.39 | (2.55, 34.60) | 7.52 x 10-04 |
| Sector 40 | 8.87 | (2.44, 32.28) | 9.26 x 10-04 |
| Sector 45 | 10.26 | (2.80, 37.71) | 4.49 x 10-04 |
| Sector 50 | 15.85 | (4.03, 62.41) | 7.75 x 10-05 |
| Sector 55 | 22.05 | (5.93, 82.09) | 3.95 x 10-06 |
| Sector 60 | 56.17 | (12.61, 250.19) | 1.25 x 10-07 |
| Sector 65 | 83.87 | (18.32, 384.04) | 1.15 x 10-08 |
| Sector 70 | 44.82 | (7.64, 263.04) | 2.53 x 10-05 |
| Sector 75 | 33.84 | (5.07, 226.10) | 2.79 x 10-04 |
| Sector 80 | 26.39 | (3.72, 187.12) | 0.001 |
| Sector 85 | 26.10 | (4.20, 162.23) | 4.65 x 10-04 |
| Sector 90 | 19.15 | (2.42, 151.87) | 0.005 |
| Minimum distance of aorta at abutting sector (mm) | 0.54 | (0.46, 0.64) | 1.42 x 10-12 |
| IDS T5-T6 | 1.07 | (0.51, 2.29) | 0.85 |
| IDS T6-T7 | 0.90 | (0.43, 1.91) | 0.79 |
| IDS T7-T8 | 0.68 | (0.35, 1.35) | 0.27 |
| IDS T8-T9 | 0.56 | (0.27, 1.18) | 0.13 |
| IDS T9-T10 | 0.74 | (0.36, 1.51) | 0.41 |
| IDS T10-T11 | 1.47 | (0.95, 2.30) | 0.09 |
| IDS T11-T12 | 0.86 | (0.59, 1.28) | 0.48 |
| IDS T12-L1 (reference) | 1.00 | - | - |
| IDS L1-L2 | 0.78 | (0.56, 1.11) | 0.17 |
| IDS L2-L3 | 0.56 | (0.38, 0.84) | 0.005 |
| IDS L3-L4 | 0.60 | (0.40, 0.92) | 0.02 |
| Sector -90 x Aorta distance (mm) | 1.80 | (1.51, 2.16) | 7.95 x 10-11 |
| Sector -85 x Aorta distance (mm) | 1.78 | (1.50, 2.13) | 9.95 x 10-11 |
| Sector -80 x Aorta distance (mm) | 1.77 | (1.48, 2.12) | 5.96 x 10-10 |
| Sector -75 x Aorta distance (mm) | 1.77 | (1.48, 2.14) | 7.75 x 10-10 |
| Sector -70 x Aorta distance (mm) | 1.75 | (1.46, 2.11) | 2.66 x 10-09 |
| Sector -65 x Aorta distance (mm) | 1.75 | (1.45, 2.12) | 4.45 x 10-09 |
| Sector -60 x Aorta distance (mm) | 1.78 | (1.47, 2.16) | 3.57 x 10-09 |
| Sector -55 x Aorta distance (mm) | 1.72 | (1.41, 2.10) | 7.51 x 10-08 |
| Sector -50 x Aorta distance (mm) | 1.69 | (1.39, 2.05) | 1.24 x 10-07 |
| Sector -45 x Aorta distance (mm) | 1.63 | (1.34, 2.00) | 1.13 x 10-06 |
| Sector -40 x Aorta distance (mm) | 1.55 | (1.27, 1.90) | 1.71 x 10-05 |
| Sector -35 x Aorta distance (mm) | 1.50 | (1.24, 1.83) | 2.86 x 10-05 |
| Sector -30 x Aorta distance (mm) | 1.43 | (1.20, 1.72) | 6.32 x 10-05 |
| Sector -25 x Aorta distance (mm) | 1.37 | (1.15, 1.63) | 3.83 x 10-04 |
| Sector -20 x Aorta distance (mm) | 1.31 | (1.09, 1.57) | 0.003 |
| Sector -15 x Aorta distance (mm) | 1.22 | (1.04, 1.45) | 0.02 |
| Sector -10 x Aorta distance (mm) | 1.16 | (0.98, 1.38) | 0.08 |
| Sector -5 x Aorta distance (mm) | 1.07 | (0.96, 1.20) | 0.21 |
| Sector 5 x Aorta distance (mm) | 1.10 | (0.96, 1.28) | 0.18 |
| Sector 10 x Aorta distance (mm) | 1.17 | (0.98, 1.39) | 0.08 |
| Sector 15 x Aorta distance (mm) | 1.25 | (1.03, 1.53) | 0.03 |
| Sector 20 x Aorta distance (mm) | 1.37 | (1.13, 1.67) | 0.002 |
| Sector 25 x Aorta distance (mm) | 1.45 | (1.20, 1.77) | 1.34 x 10-04 |
| Sector 30 x Aorta distance (mm) | 1.52 | (1.29, 1.81) | 1.25 x 10-06 |
| Sector 35 x Aorta distance (mm) | 1.64 | (1.36, 2.00) | 3.04 x 10-07 |
| Sector 40 x Aorta distance (mm) | 1.67 | (1.39, 2.01) | 3.78 x 10-08 |
| Sector 45 x Aorta distance (mm) | 1.69 | (1.42, 2.02) | 5.74 x 10-09 |
| Sector 50 x Aorta distance (mm) | 1.76 | (1.48, 2.11) | 2.09 x 10-10 |
| Sector 55 x Aorta distance (mm) | 1.80 | (1.51, 2.15) | 6.17 x 10-11 |
| Sector 60 x Aorta distance (mm) | 1.91 | (1.59, 2.31) | 1.20 x 10-11 |
| Sector 65 x Aorta distance (mm) | 1.96 | (1.63, 2.36) | 9.92 x 10-13 |
| Sector 70 x Aorta distance (mm) | 1.90 | (1.58, 2.29) | 7.84 x 10-12 |
| Sector 75 x Aorta distance (mm) | 1.87 | (1.56, 2.26) | 4.23 x 10-11 |
| Sector 80 x Aorta distance (mm) | 1.86 | (1.55, 2.24) | 5.67 x 10-11 |
| Sector 85 x Aorta distance (mm) | 1.85 | (1.55, 2.21) | 9.61 x 10-12 |
| Sector 90 x Aorta distance (mm) | 1.83 | (1.53, 2.20) | 7.41 x 10-11 |

Supplemental figure 1. Schematic of the vertebral regions and aortic distance included in the analyses. MinAV distance = minimum distance from aorta to vertebral rim. The abutting sector was the angular sector of the vertebra at the minimum distance. Sectors within 90 degrees on either side of the abutting sector were analyzed.


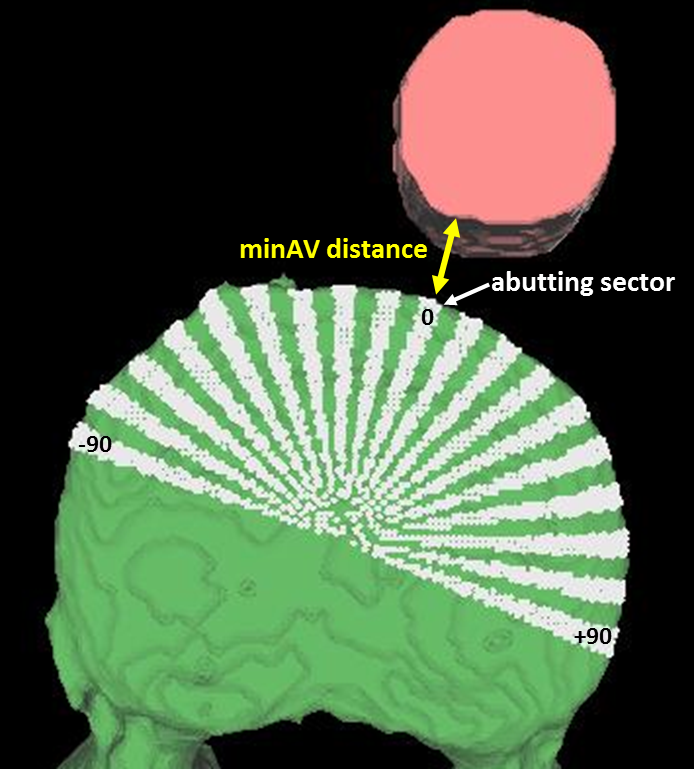


Supplemental figure 2. Variation of the average angular sector closest to the aorta with the intervertebral disc space level.

Supplemental figure 3. Heatmaps showing syndesmophytes and their location relative to the aorta. Each column represents an intervertebral disc space. The abutting sector (angular sector 0) is outlined in red. The scale presents the relative height of syndesmophytes from none (0) to 1.0 (bridging) in each sector in the 90 degrees on either side of the abutting sector.


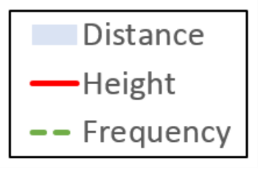
Supplemental figure 4. Relationship between syndesmophytes and the distance of the vertebral rim to the aorta in 11 intervertebral disk spaces. The X axis represents the location of the angular sectors on the vertebral rim in relationship to the aorta. Plots are centered around the abutting sector. Blue bars represent the mean distance from each angular sector to the closest part of the aortic wall (left Y axis). Syndesmophyte frequency (green line) and mean syndesmophyte height (red line) are plotted for each angular sector (right Y axis). The number of subjects that contributed data varied among different intervertebral disk spaces.


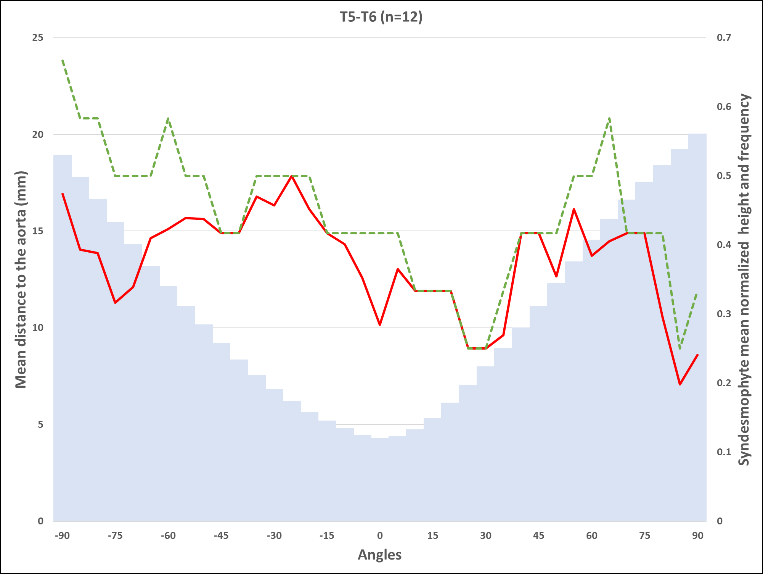

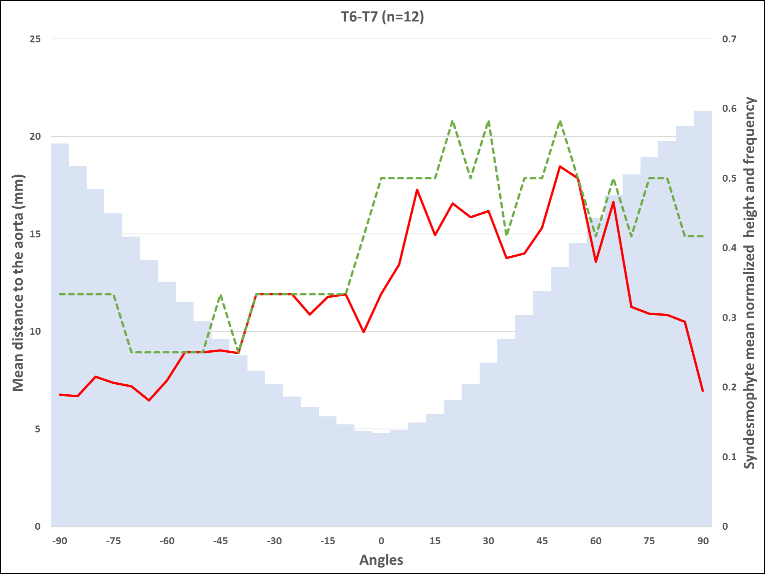

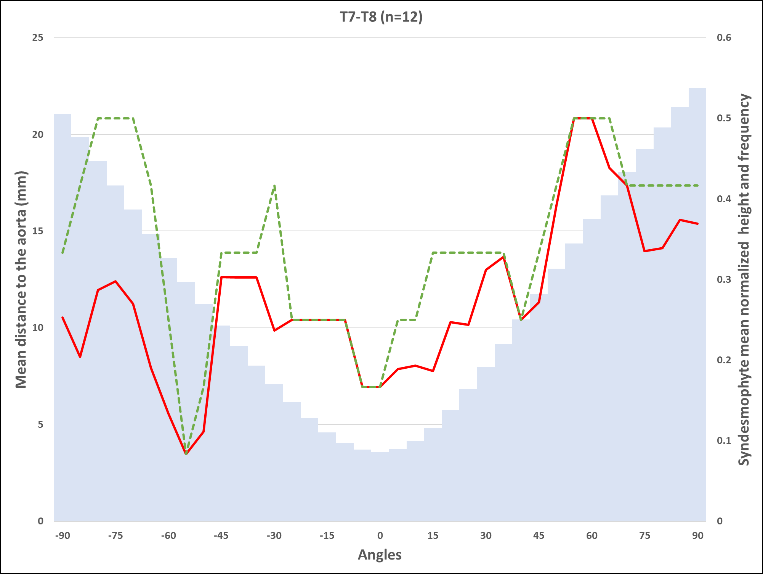

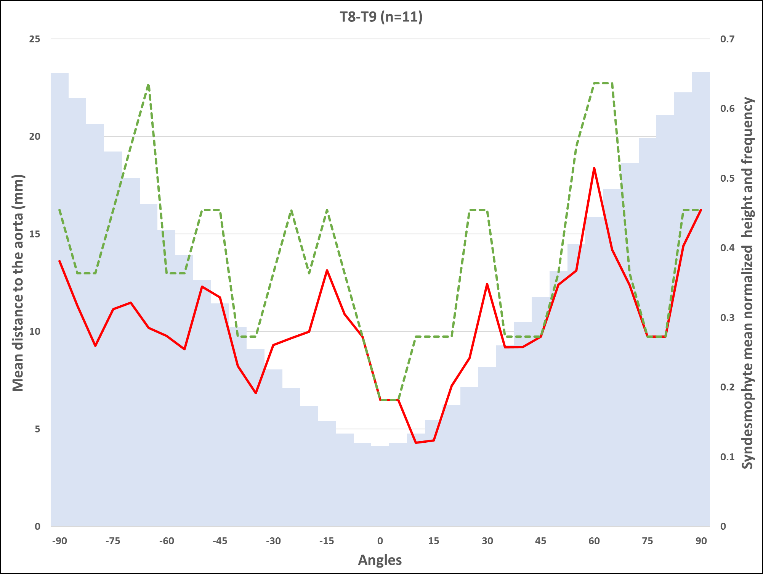

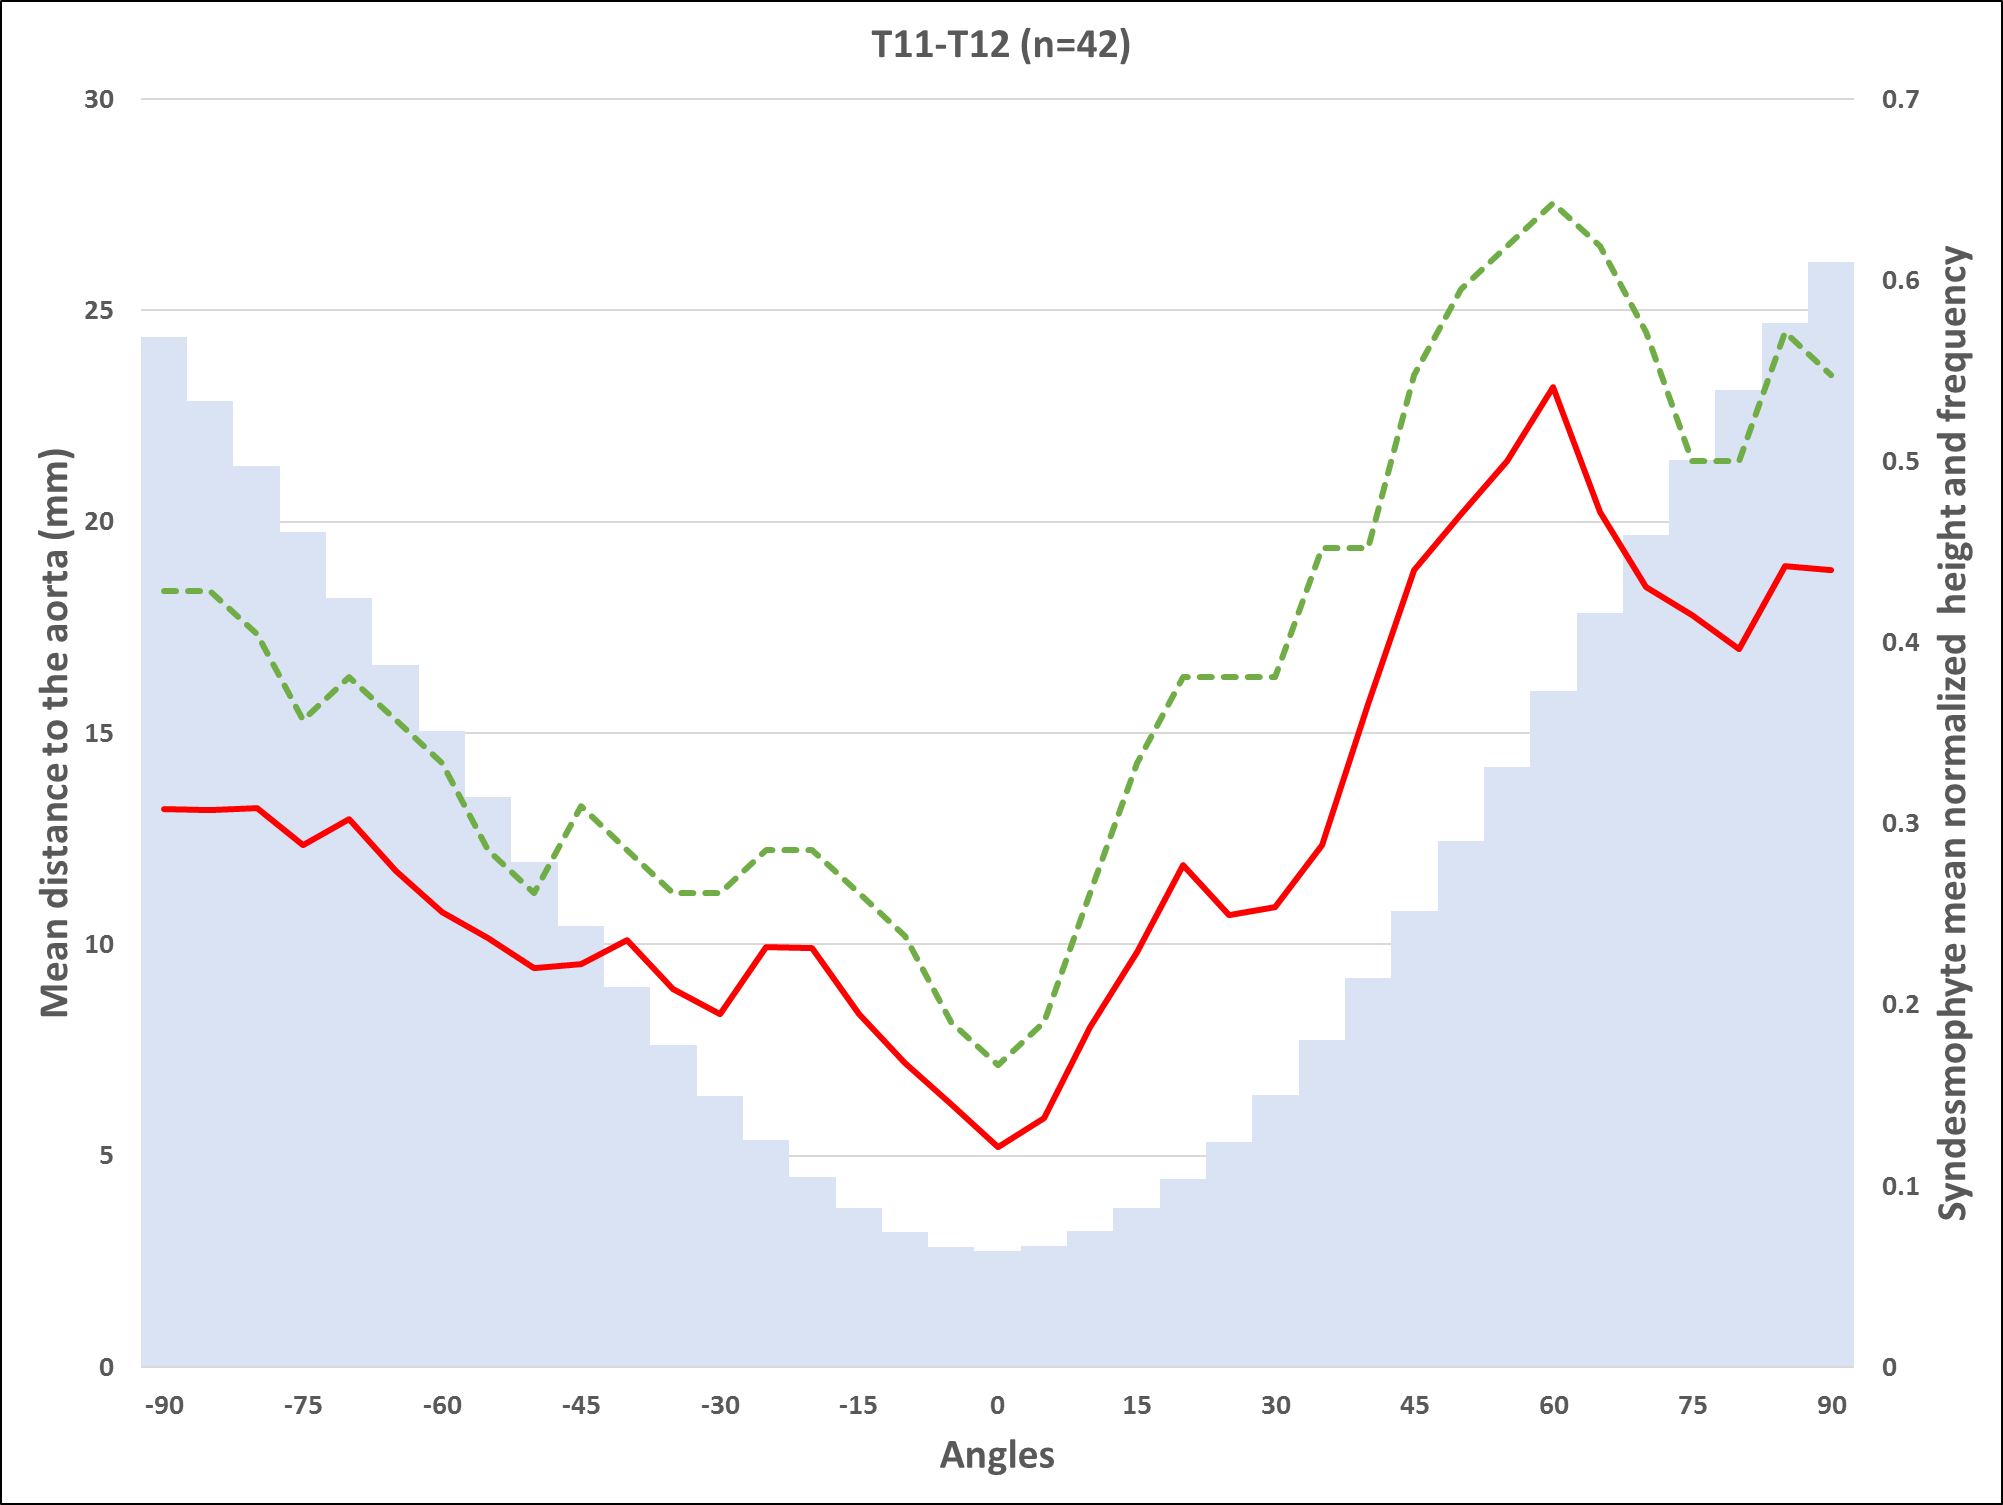

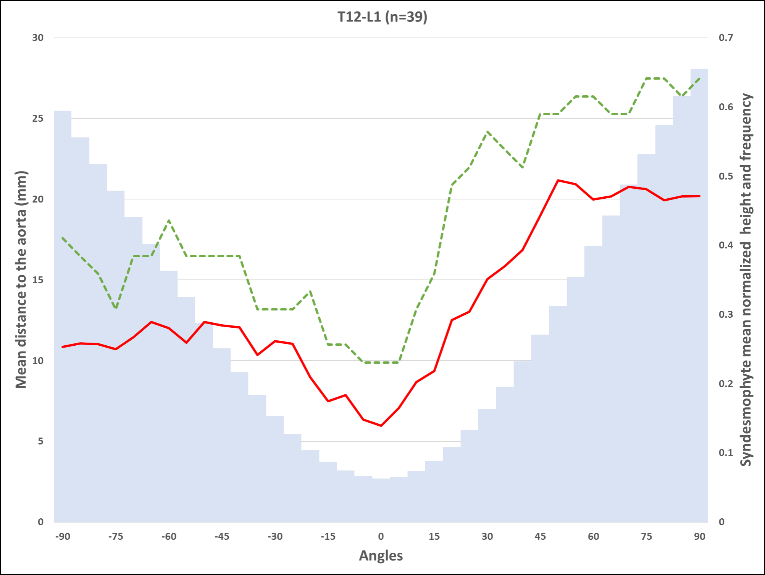

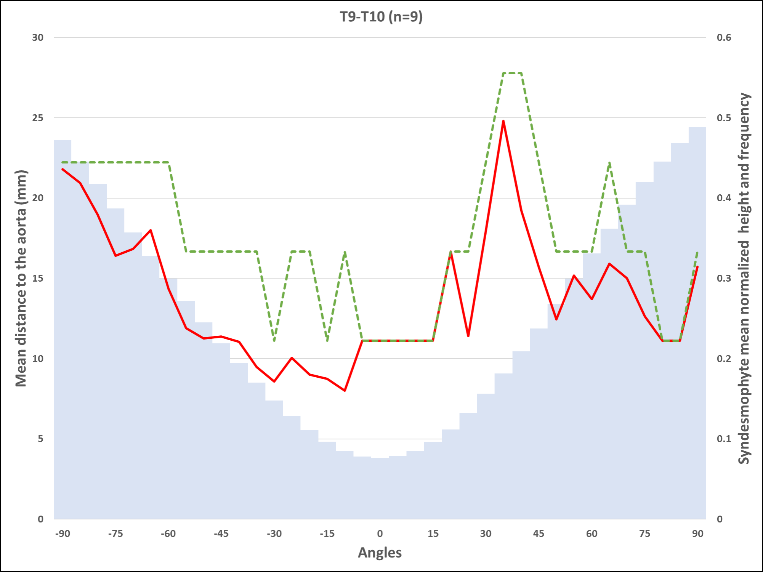

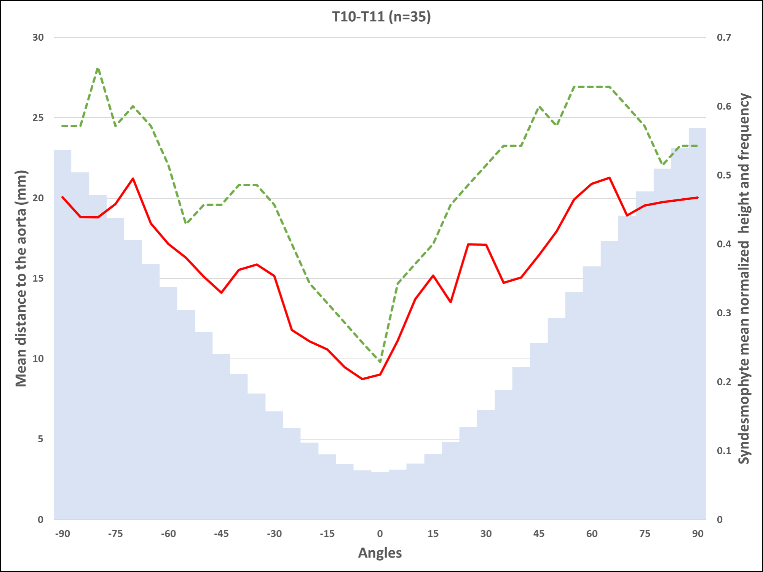

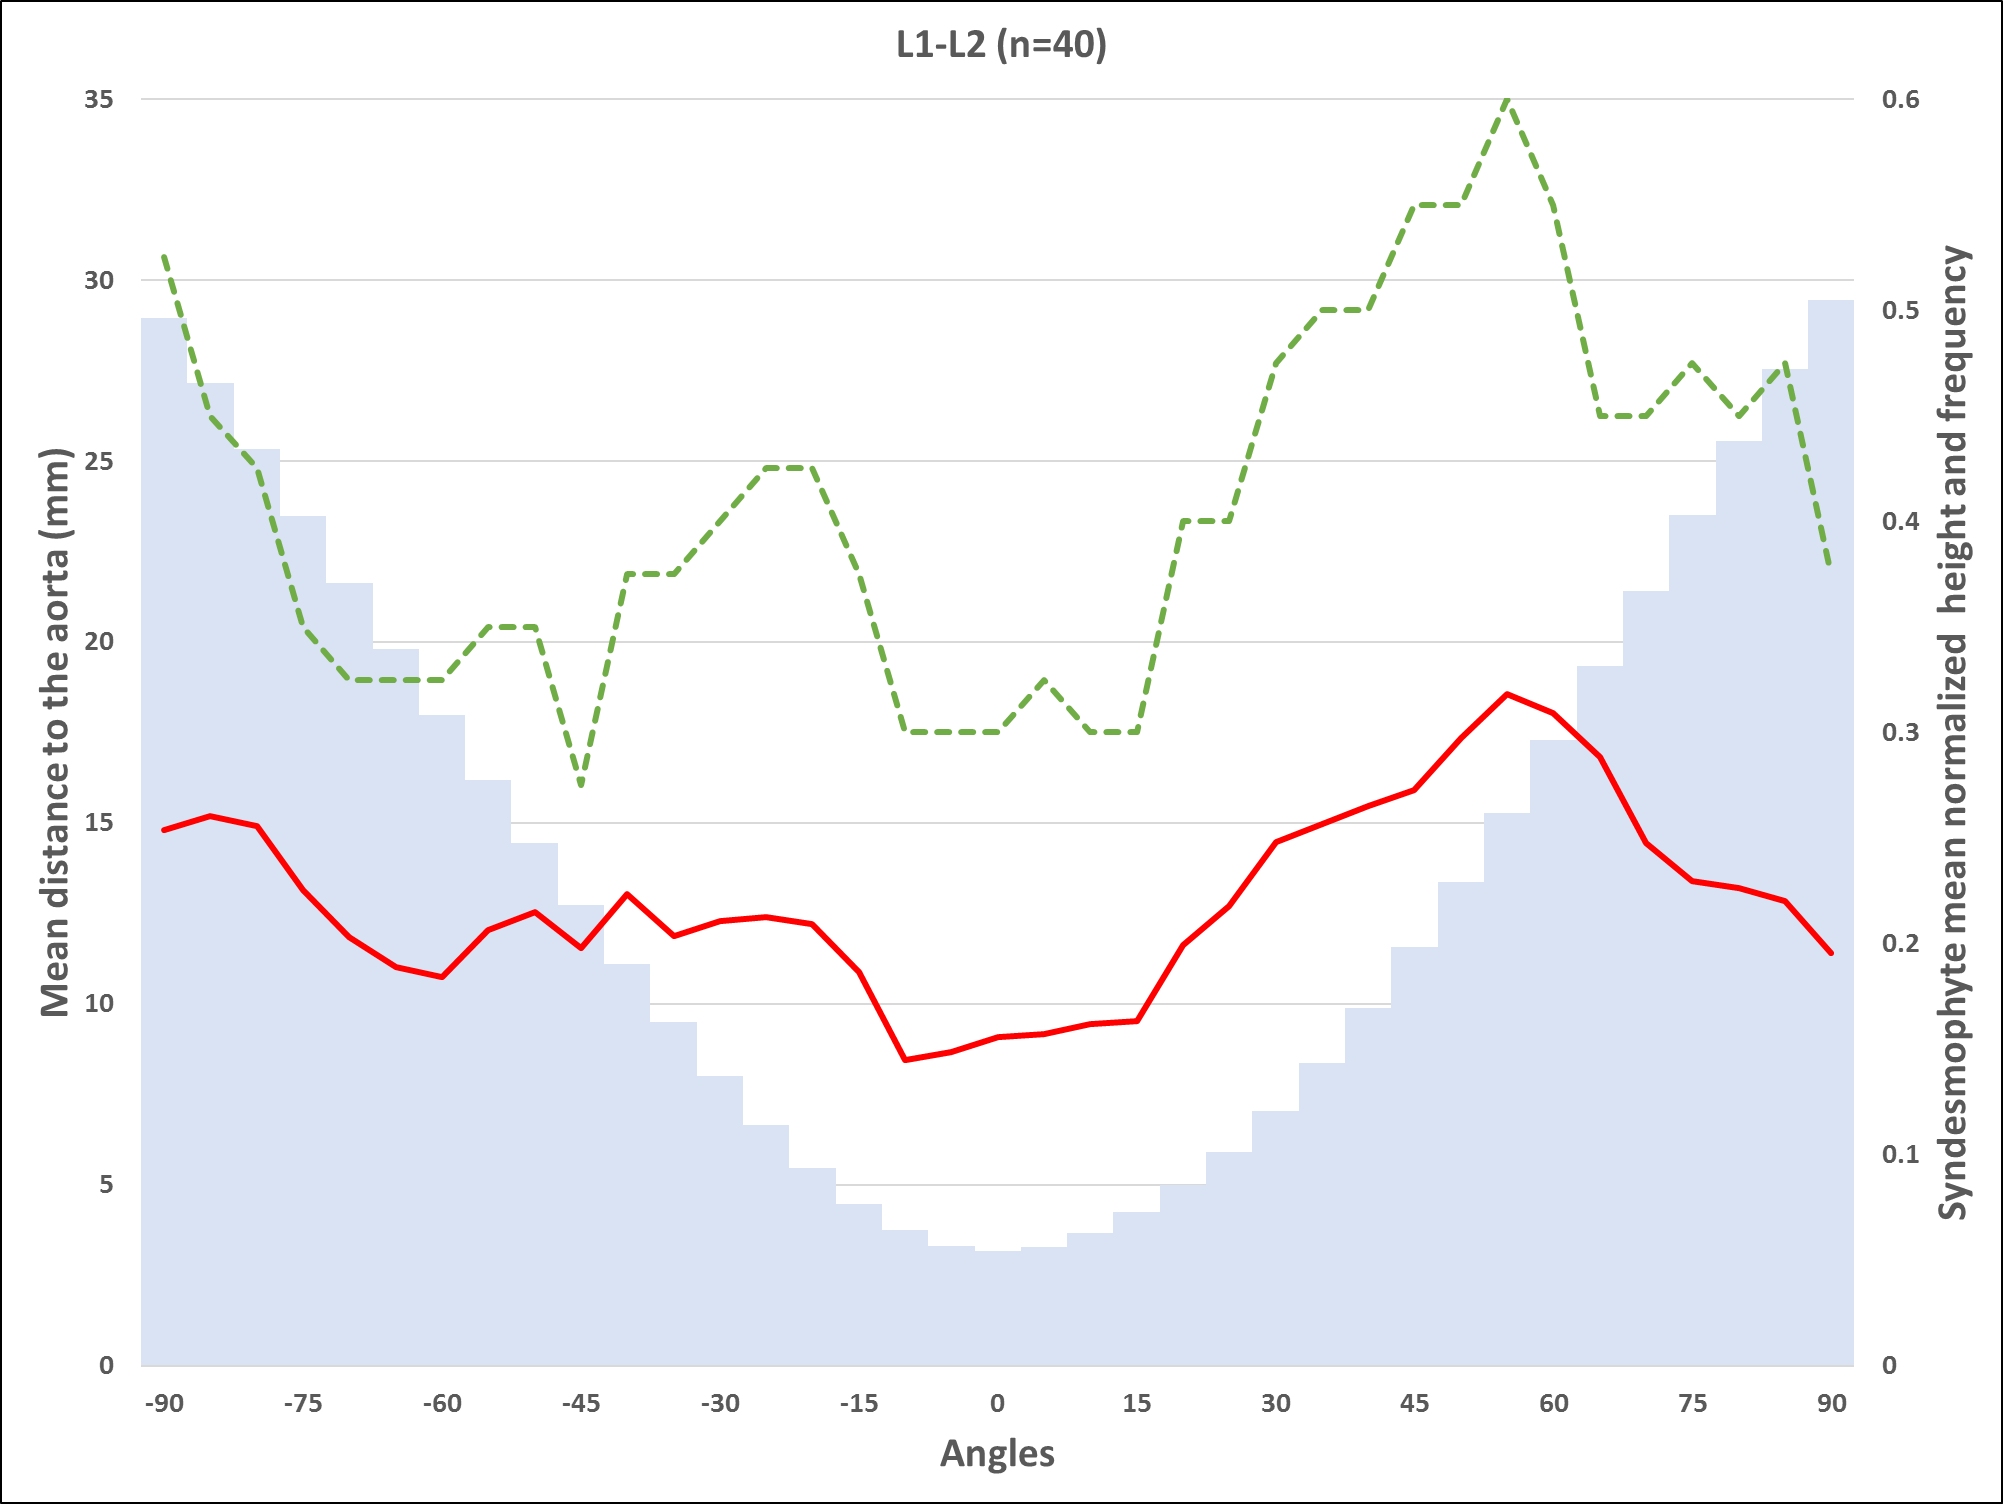

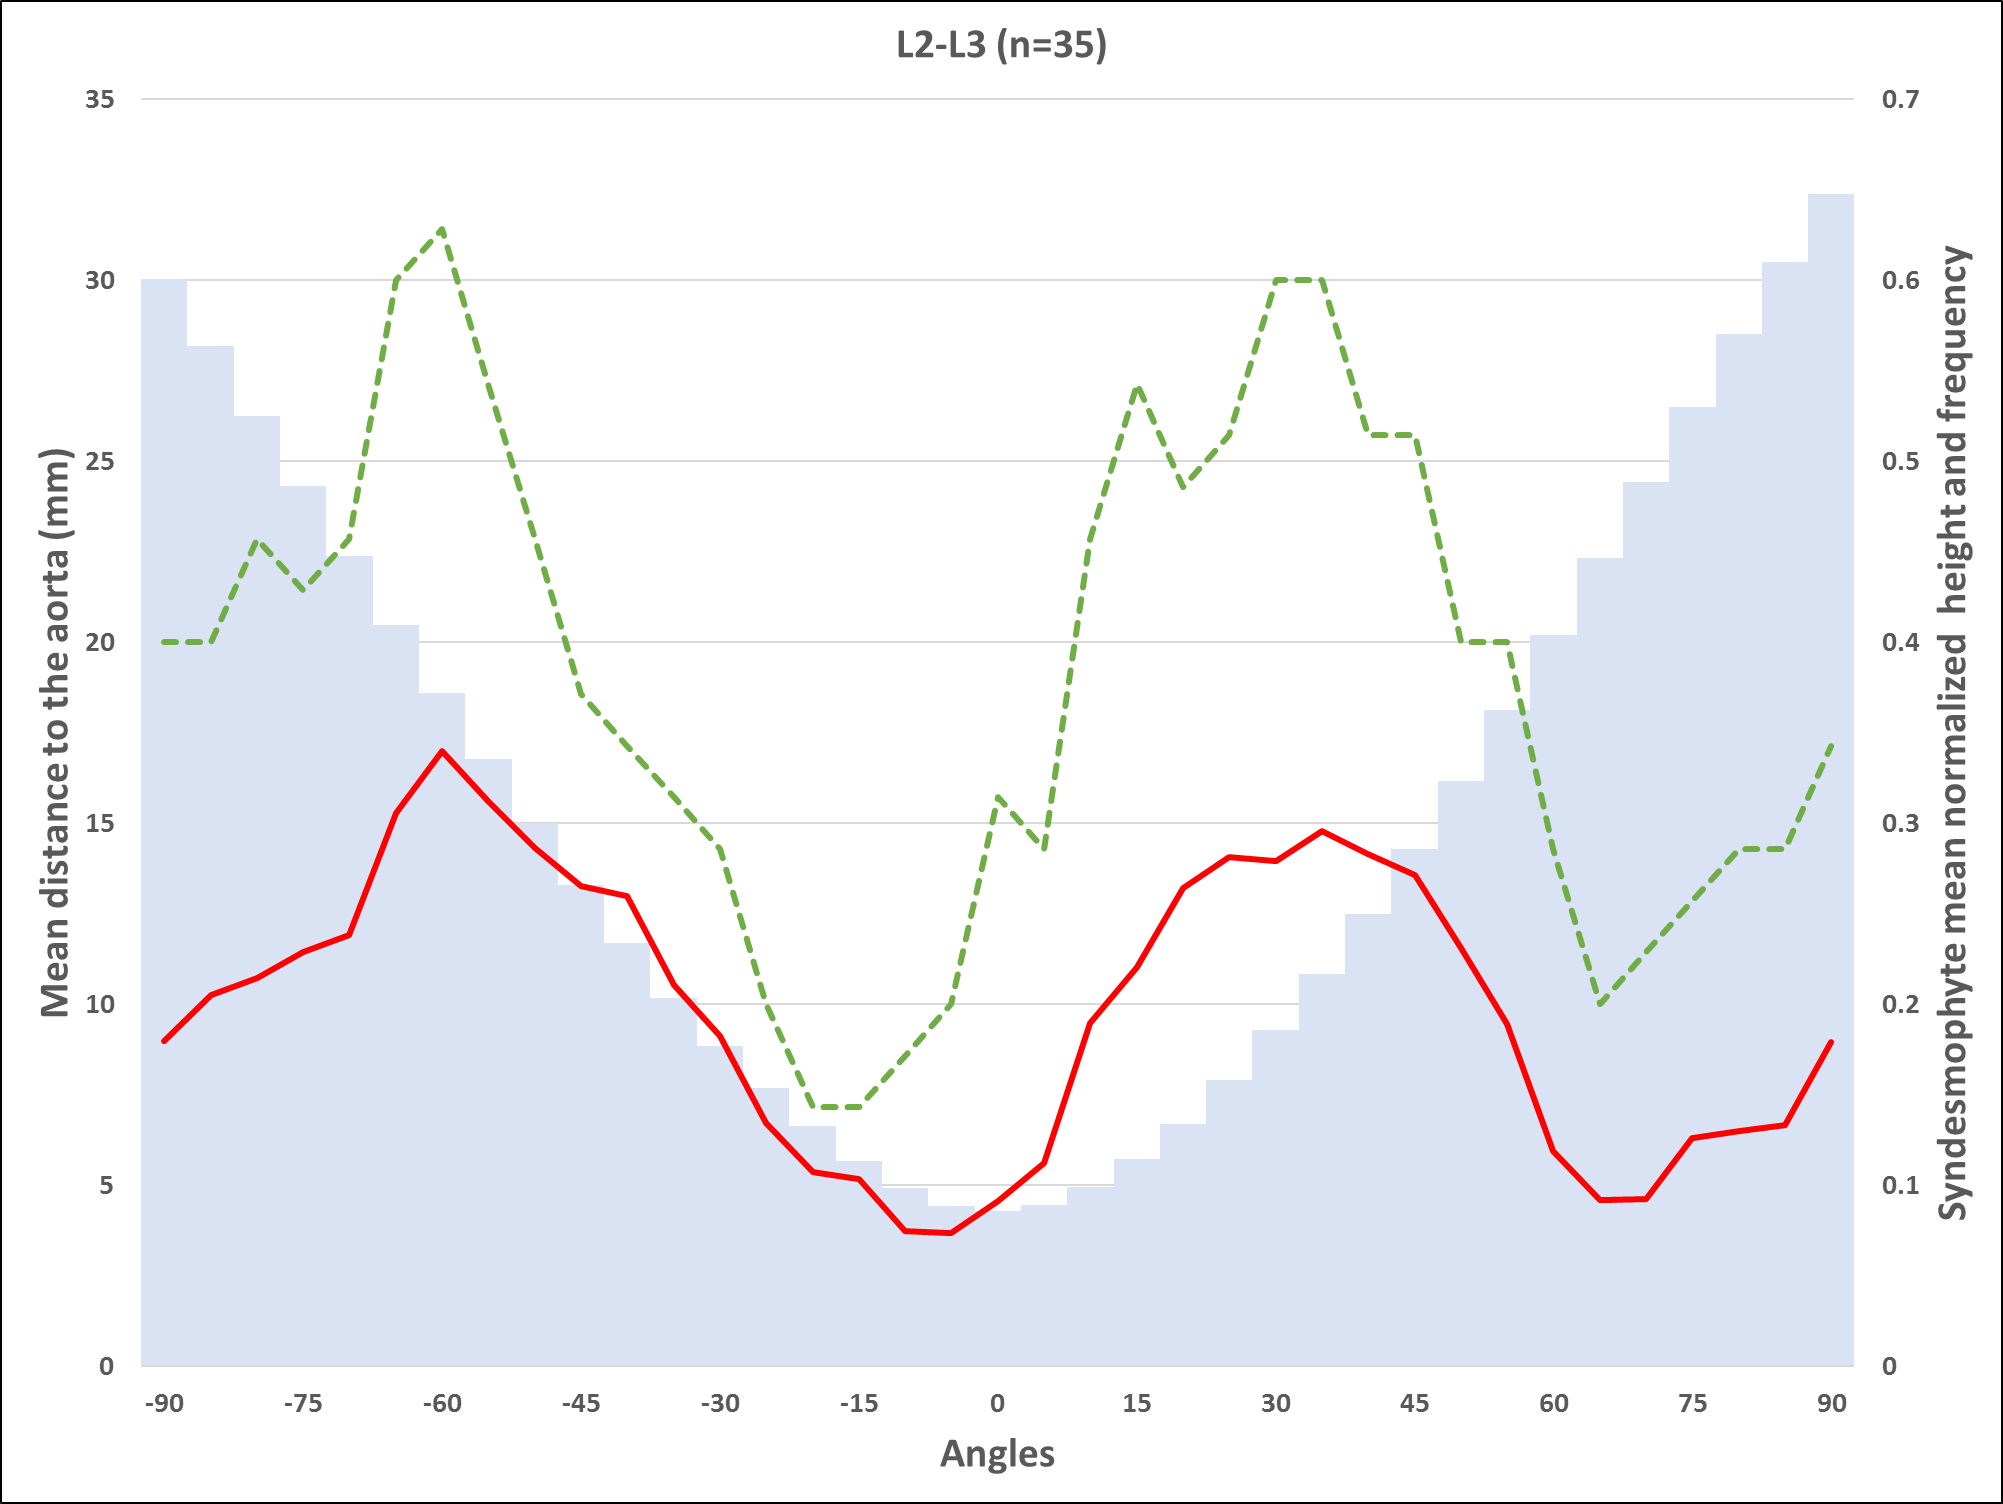


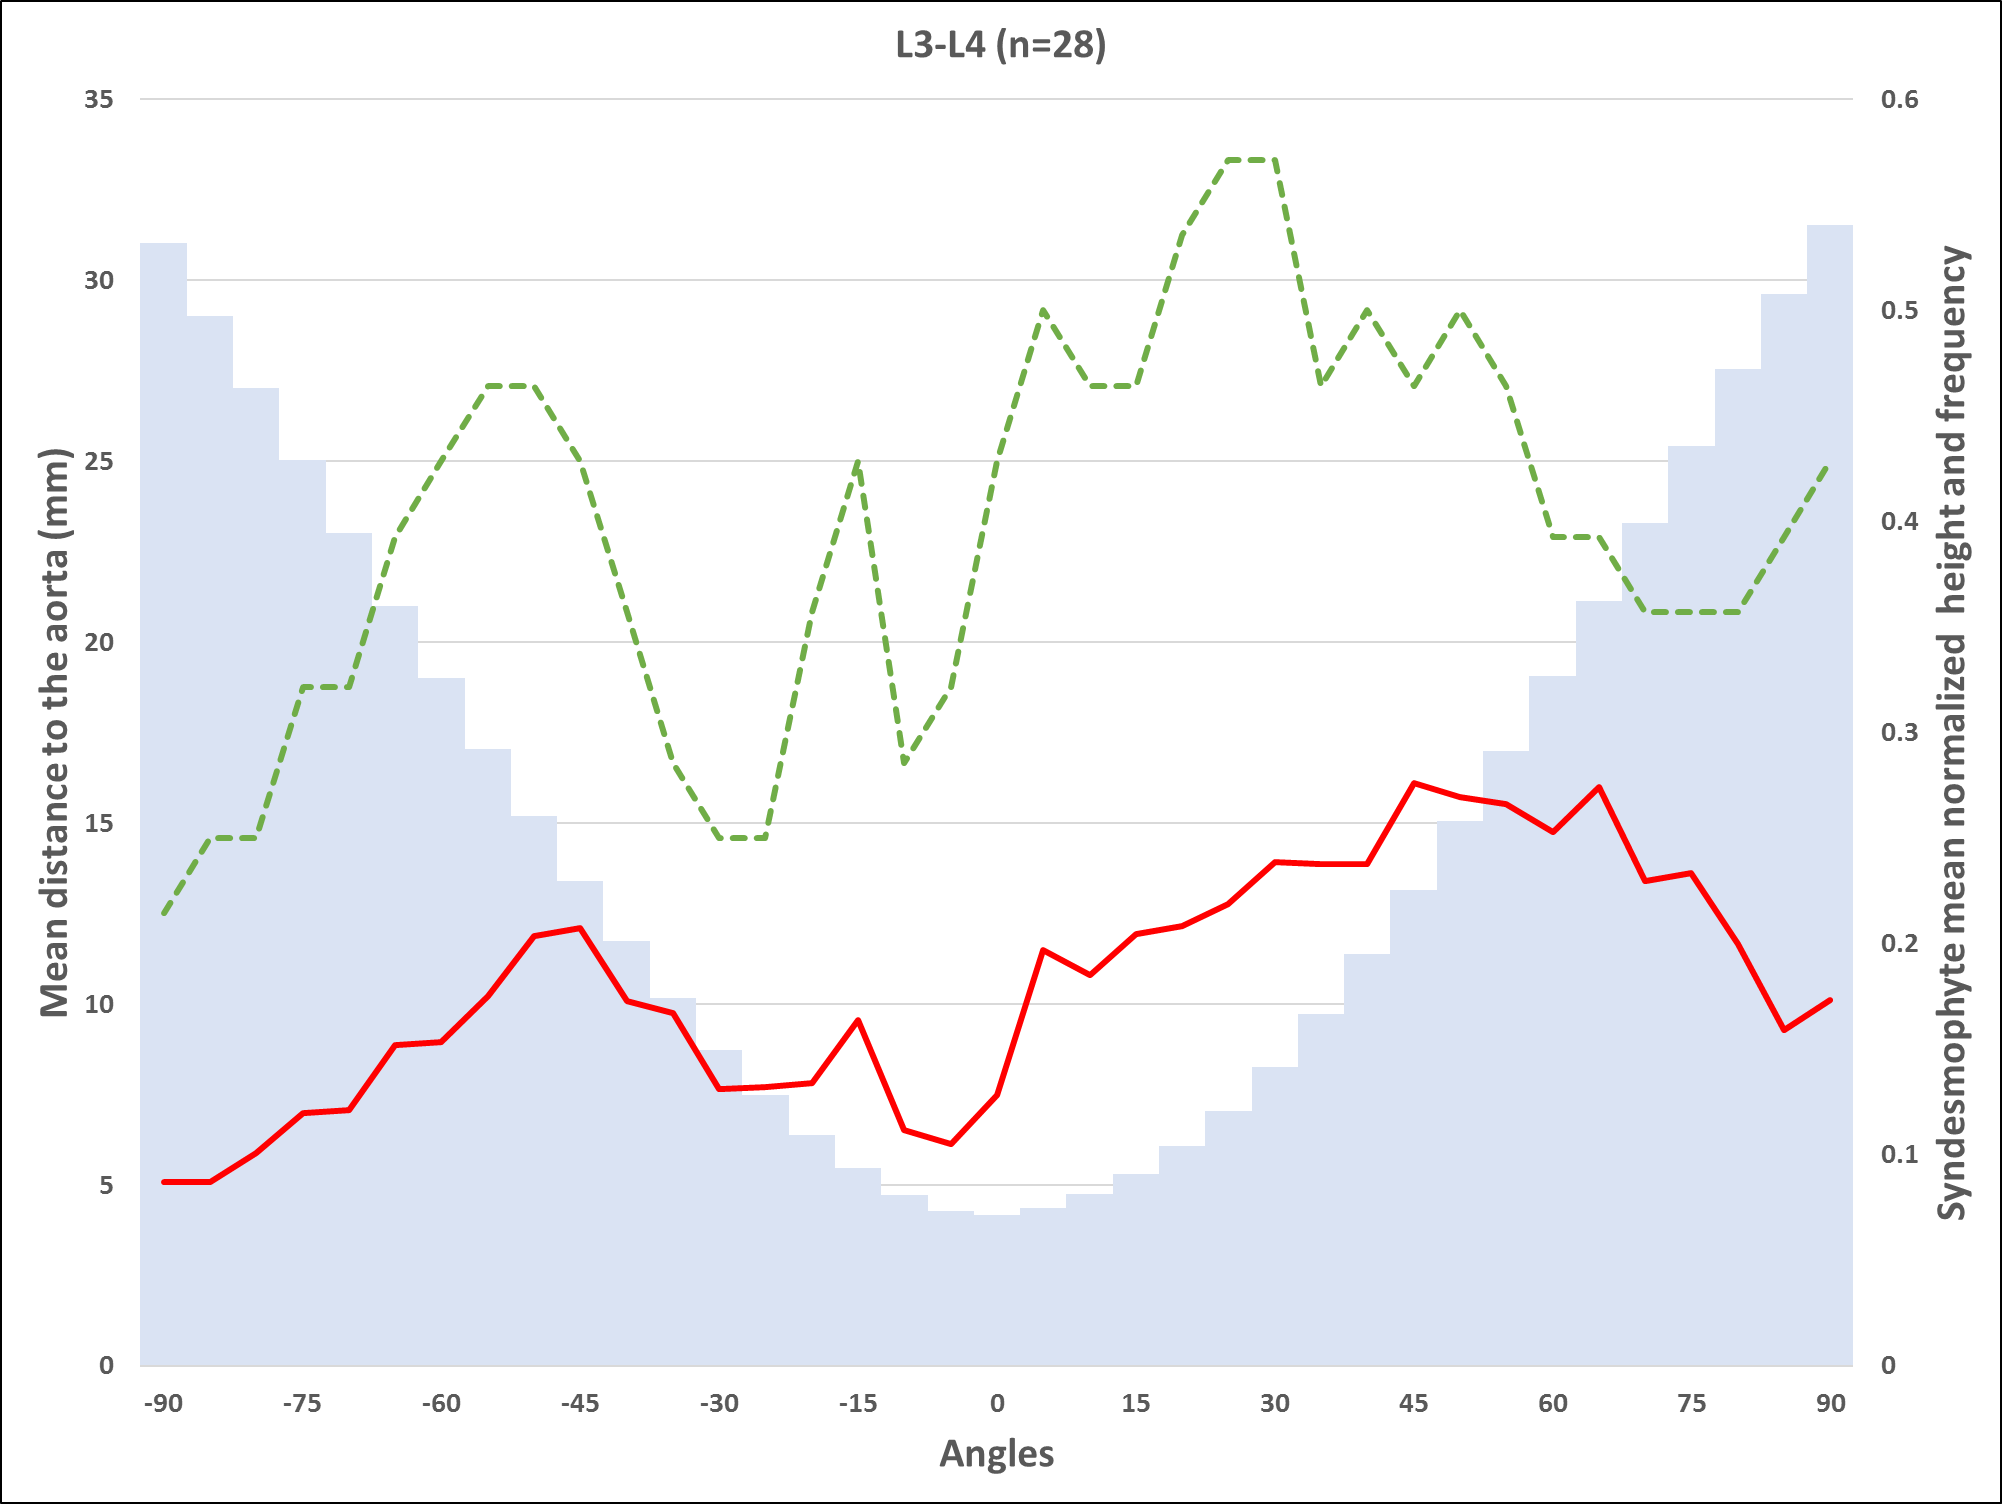


Supplemental figure 5. Mean minimal distance from the aorta to the vertebral rim at the abutting sector, by intervertebral disc space. Data are from 22 subjects who had CT scans at all intervertebral disc spaces. Values are mean and error bars are standard deviation.


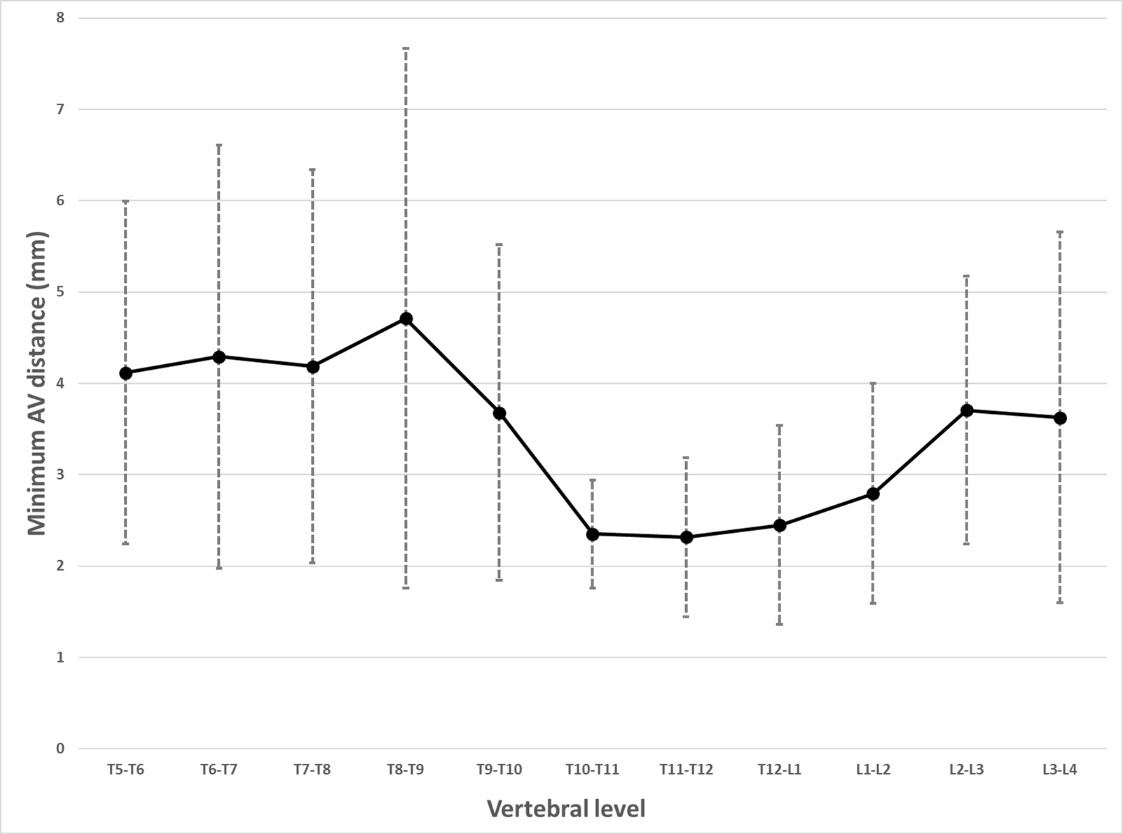


Supplemental figure 6. Odds ratio with 95% confidence intervals for the risk of a syndesmophyte in a sector per 1 mm decrease in minimum AV distance, stratified by the presence of aortal calcification at the intervertebral disc space (IDS). Estimates are based on a generalized estimating equation (GEE) model with working exchangeable correlation structure using robust standard error estimates and are adjusted for IDS level. Odds ratios were largely similar between IDSs with and without aortic wall calcification across all sectors, with similar inhibition at and near the abutting sector (at 0).
